# Supplementary material
Source: publisher figshare collection journal article supplement (https://sage.figshare.com/ndownloader/files/17985767)
Supplement: Supplementary file 1 [file 17985767]

Supplemental Table S1.

Preseason and Postseason Scores of Latent Variable Indicators ( $N = 220$ - $223$ )

|                                                             | #     | T1       | T2       | Preseason |           | Postseason |           | <i>t</i> -test <sub>paired</sub> |
|-------------------------------------------------------------|-------|----------|----------|-----------|-----------|------------|-----------|----------------------------------|
|                                                             | Items | $\alpha$ | $\alpha$ | <i>X</i>  | <i>SD</i> | <i>X</i>   | <i>SD</i> |                                  |
| <b>Program Safety Climate</b> ( <i>N</i> = 220)             |       |          |          |           |           |            |           |                                  |
| Head Coach                                                  | 8     | .93      | .96      | 4.29      | .62       | 4.27       | .84       | .378                             |
| Coordinator                                                 | 8     | .96      | .98      | 4.32      | .69       | 4.27       | .86       | .957                             |
| Position Coach                                              | 8     | .96      | .98      | 4.31      | .74       | 4.21       | .89       | 1.70                             |
| <b>Social Norms/Support for Reporting</b> ( <i>N</i> = 223) |       |          |          |           |           |            |           |                                  |
| Support Teammates                                           | 2     | .87      | .91      | 4.42      | .61       | 4.43       | .66       | -.373                            |
| Important Others                                            | 6     | .86      | .91      | 4.32      | .56       | 4.33       | .66       | -.025                            |
| Expect and Support Teammates Approve                        | 4     | .88      | .74      | 3.76      | .74       | 3.81       | .83       | -.840                            |
| <b>Self-Efficacy to Report Symptoms</b> ( <i>N</i> = 223)   |       |          |          |           |           |            |           |                                  |
| When want to keep playing                                   | 1     | -        | -        | 3.89      | .96       | 4.08       | .91       | <b>-2.63**</b>                   |
| When teammates want me to play                              | 1     | -        | -        | 3.91      | .95       | 4.02       | .95       | -1.57                            |
| Even if symptoms don't seem bad.                            | 1     | -        | -        | 3.47      | 1.11      | 3.80       | 1.12      | <b>-4.03***</b>                  |
| Even if not sure a concussion                               | 1     | -        | -        | 3.42      | 1.11      | 3.80       | 1.13      | <b>-4.61***</b>                  |
| <b>Intentions to Report Symptoms</b> ( <i>N</i> = 223)      |       |          |          |           |           |            |           |                                  |
| During a Game/Practice                                      | 3     | .78      | .79      | 3.59      | .86       | 3.67       | .86       | -1.37                            |
| Even if no one else knows                                   | 1     | -        | -        | 6.51      | 2.11      | 7.00       | 2.02      | <b>-3.39**</b>                   |
| General intentions                                          | 3     | .96      | .98      | 5.28      | 1.48      | 5.58       | 1.52      | <b>-2.90**</b>                   |

Notes: Significant *t*-test coefficients in bold. \*  $p < .05$ , \*\*  $p < .01$ , \*\*\*  $p < .001$
